# Supplementary material for: Substantial differences in soil viral community composition within and among four Northern California habitats
Source: PubMed Central journal article supplement (PMC9723544; doi:10.1038/s43705-022-00171-y), 2022-10-13

Supplementary figure 1: Map of sampling sites in Northern California colored by habitat

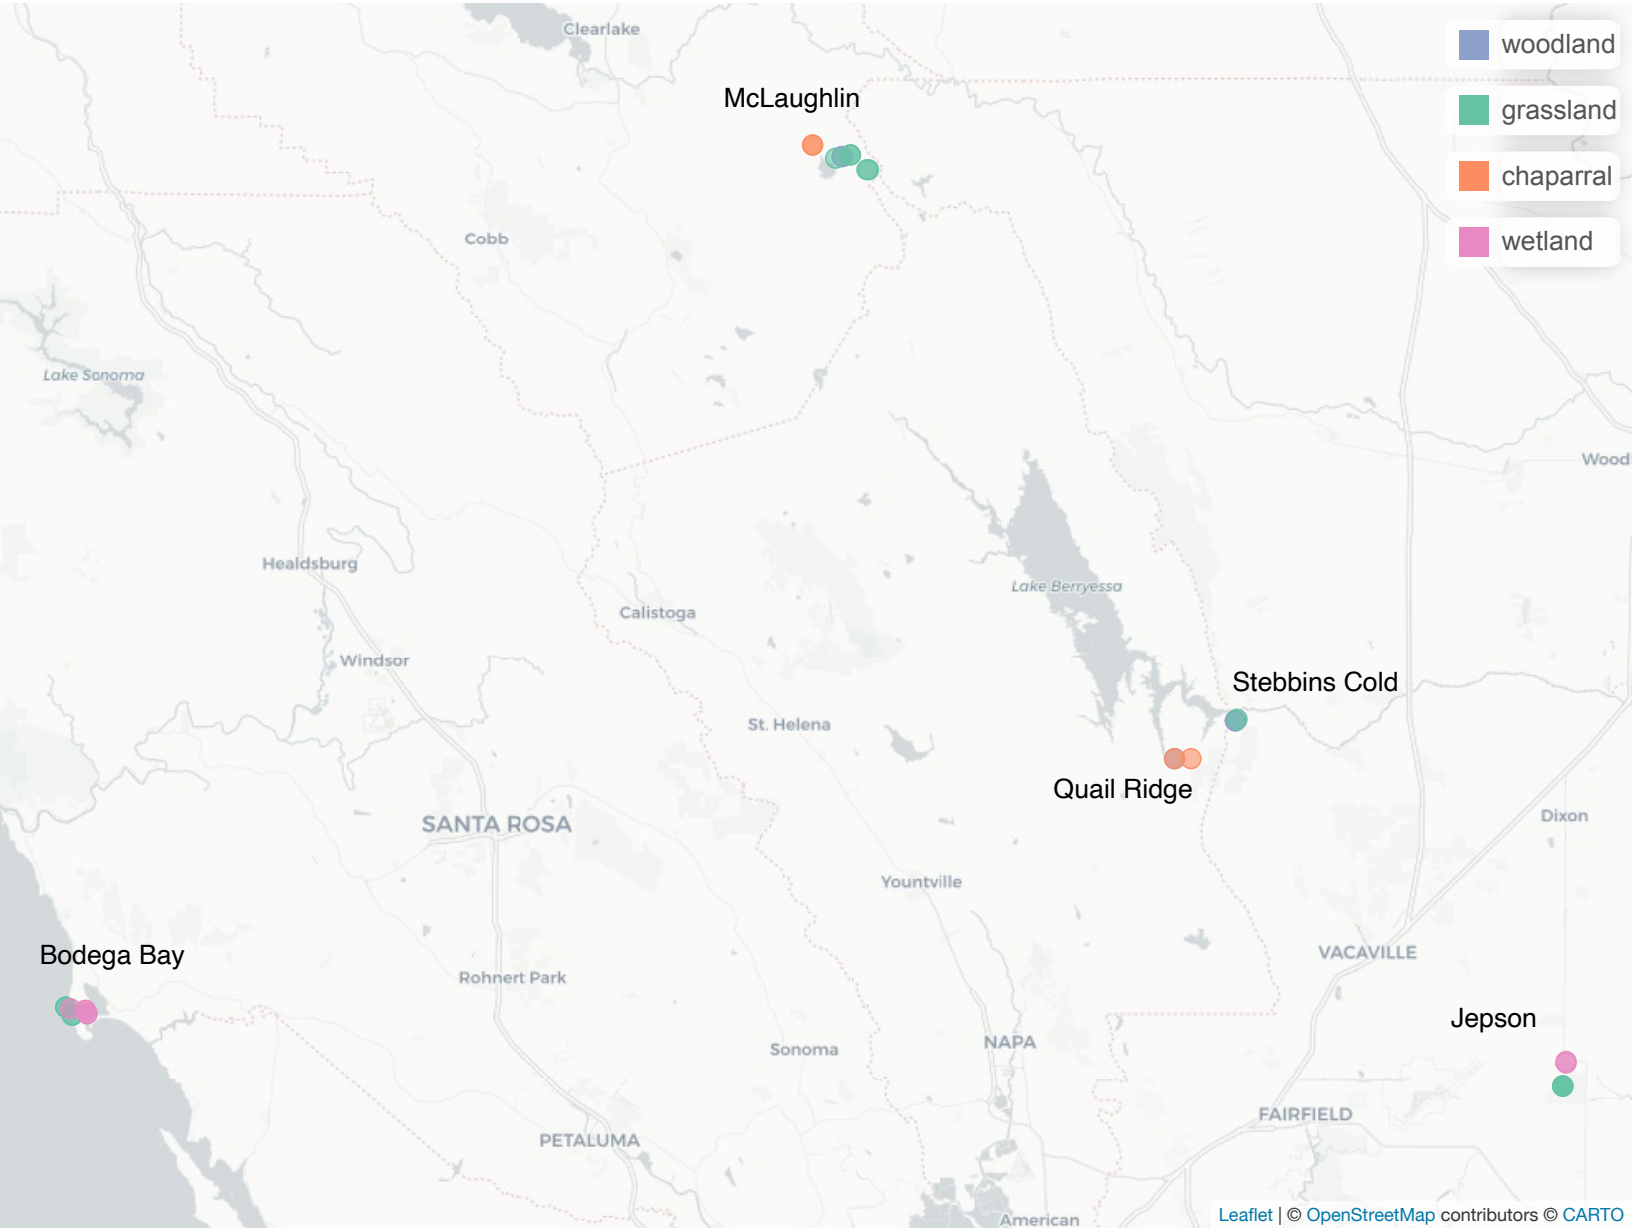

**A** Viral community composition by habitat

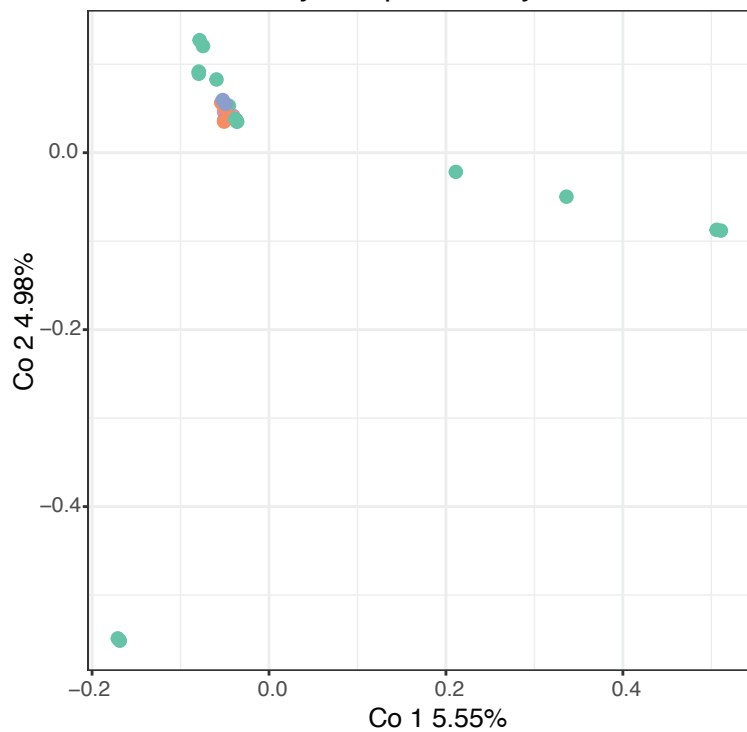

**B** Viral community composition by habitat - no grassland

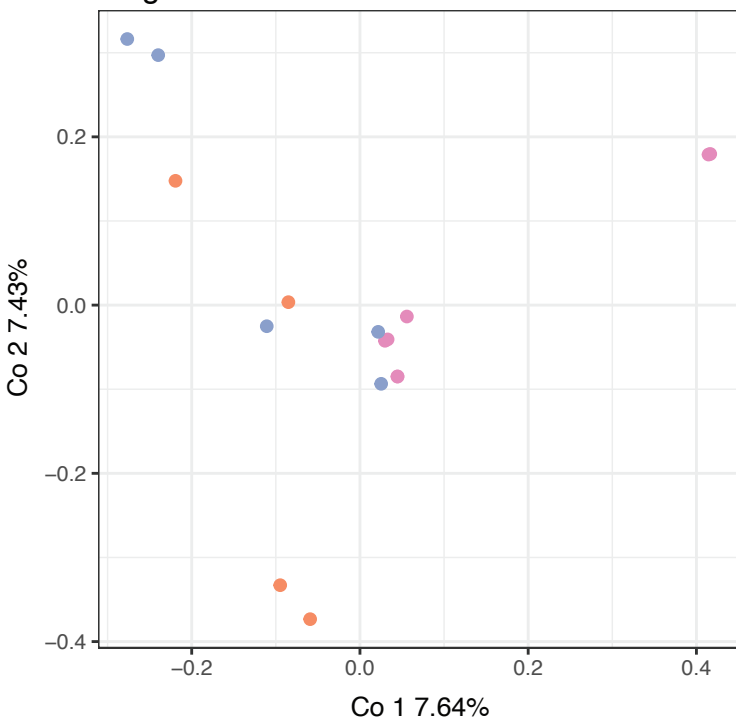

**C** Capscale Analysis of viral community composition

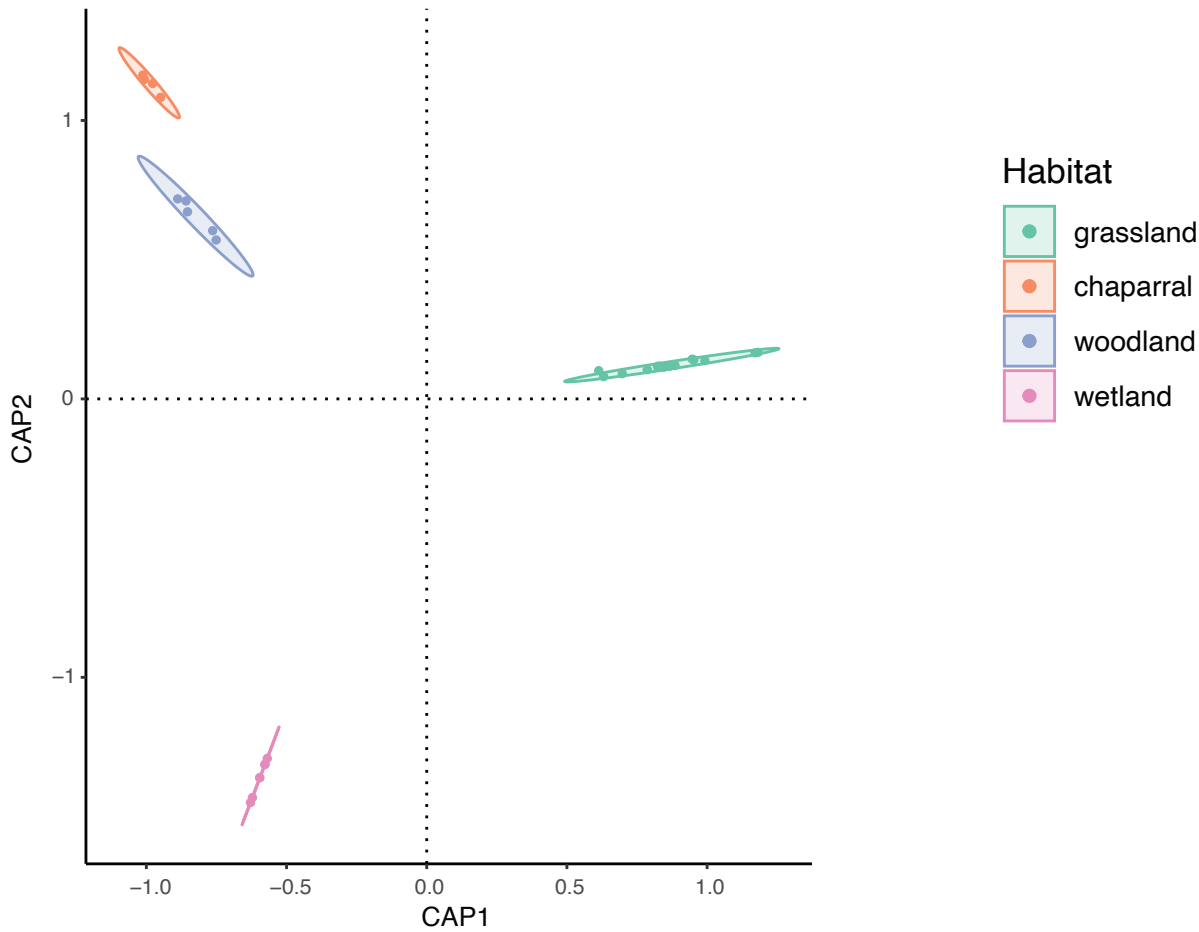

Supplement: 43705_2022_171_MOESM6_ESM.pdf [file 43705_2022_171_MOESM6_ESM.pdf]
